# Supplementary material
Source: Royal Society of Chemistry journal article supplement (doi:10.1039/d5lf00339c)
Supplement: d5lf00339c1.pdf [file d5lf00339c1.pdf]

## Supporting Information

### **A self-powered (In,Ga)N biosensor with Au nanoparticles for monitoring live cell activities**

Linrui Cheng,<sup>1,2†</sup> Qianyi Zhang,<sup>2†</sup> Binbin Hou,<sup>1,2</sup> Zixun Wang,<sup>1,3,\*</sup>

Yibin Wang,<sup>4</sup> Jianya Zhang,<sup>4,\*</sup> Yukun Zhao<sup>1,2,5\*</sup>

<sup>1</sup> School of Nano-Tech and Nano-Bionics, University of Science and Technology of China, Hefei 230026, China.

<sup>2</sup> Key Laboratory of Semiconductor Display Materials and Chips, Suzhou Institute of Nano-Tech and Nano-Bionics (SINANO), Chinese Academy of Sciences (CAS), Suzhou 215123, China.

<sup>3</sup> Jiangsu Key Laboratory of Organoid Engineering and Precision Medicine, SINANO, CAS, Suzhou 215123, China.

<sup>4</sup> Key Laboratory of Intelligent Optoelectronic Devices and Chips of Jiangsu Higher Education Institutions, School of Physical Science and Technology, Suzhou University of Science and Technology, Suzhou 215009, China.

<sup>5</sup> Guangdong Institute of Semiconductor Micro-Nano Manufacturing Technology, Foshan 528225, China

† These authors contributed equally to this work.

\* Corresponding author: zixunwang2021@sinano.ac.cn; jy Zhang2022@usts.edu.cn; ykzhao2017@sinano.ac.cn

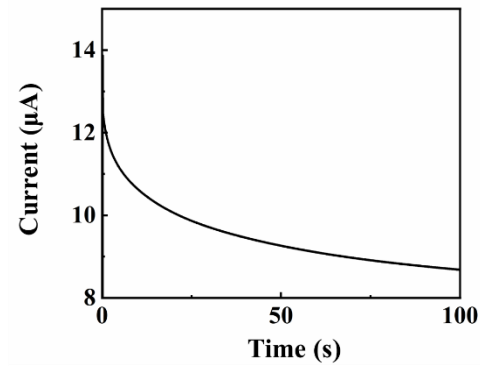

**Figure S1.** Current curve of sample A.

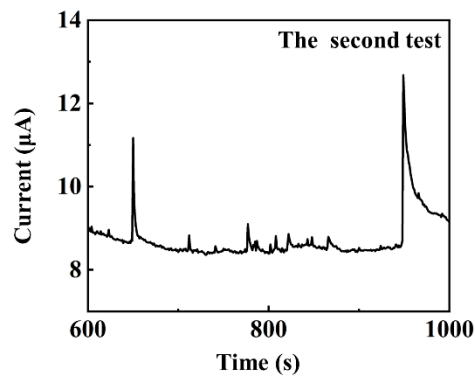

**Figure S2.** The current change of the device with Au NPs in the second test.

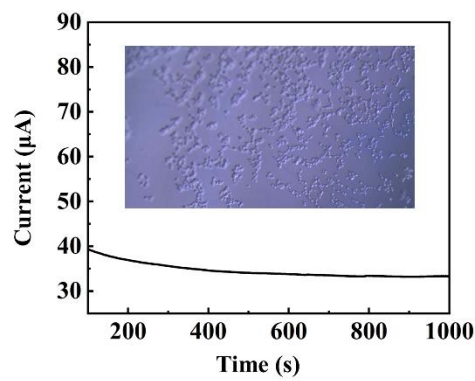

**Figure S3.** The result of testing 293T cells. The inset shows an optical microscope (OM) image of the cells on the device surface (magnified 200x).

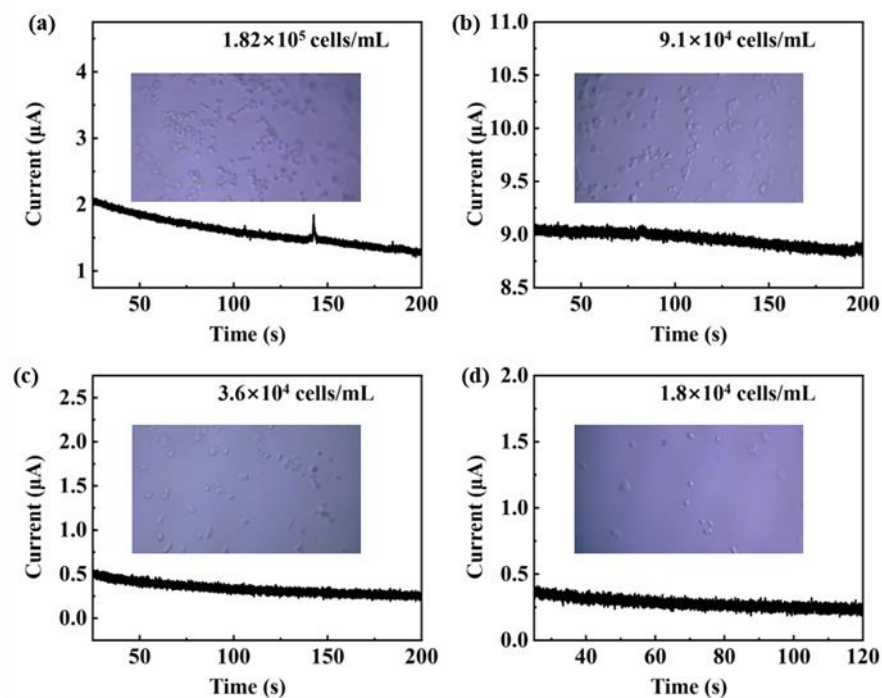

**Figure S4.** Current response of devices at different cell concentrations: (a)  $1.82 \times 10^5$  cells/mL, (b)  $9.1 \times 10^4$  cells/mL, (c)  $3.6 \times 10^4$  cells/mL, (d)  $1.8 \times 10^4$  cells/mL. The insets show the OM images of the corresponding cells on the device surfaces (magnified 200x).

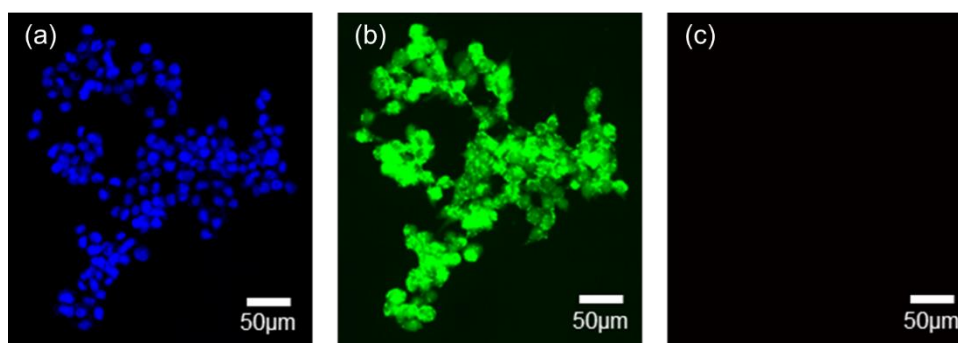

**Figure S5.** Fluorescence images of HCT-116 cells on the surface of the device after live/dead staining. (a) The blue channel displays the nuclei of all cells (live and dead). (b) The green channel displays live cells with complete esterase activity. (c) The red channel displays dead cells with damaged cell membranes. Cells are stained with Hoechst 33342 (blue, nucleus staining), Calcein AM (green, live cells), and propidium iodide (PI, red, dead cells).
